# Supplementary material
Source: PubMed Central journal article supplement (PMC3478653)
Supplement: 1214128109_pnas.201214128SI.pdf [file 1214128109_pnas.201214128SI.pdf]

# Supporting Information

Chugani et al. 10.1073/pnas.1214128109

## SI Materials and Methods

For cDNA synthesis, 1  $\mu\text{L}$  of 100  $\mu\text{M}$  selective primer mix was combined with 1  $\mu\text{L}$  (500 ng) of template and 3  $\mu\text{L}$  of water. The mix was heated at 65  $^{\circ}\text{C}$  for 5 min and chilled at 4  $^{\circ}\text{C}$  before adding 5  $\mu\text{L}$  of reverse transcription master mix (2  $\mu\text{L}$  of 5 $\times$  first-strand buffer, 0.5  $\mu\text{L}$  of 100 mM DTT, 2  $\mu\text{L}$  of 10 mM dNTP, and 0.5  $\mu\text{L}$  of SuperScript III enzyme). The reaction mixture was incubated at 40  $^{\circ}\text{C}$  for 90 min and cooled to 4  $^{\circ}\text{C}$ . For second-strand synthesis, 10  $\mu\text{L}$  of the first-strand reaction was added to 65  $\mu\text{L}$  of the nick-translation mix (45.5  $\mu\text{L}$  of water, 15  $\mu\text{L}$  of 5 $\times$  second-strand buffer, 1.5  $\mu\text{L}$  of 10 mM dNTP, 0.5  $\mu\text{L}$  of *Escherichia coli* DNA Ligase, 2.0  $\mu\text{L}$  of *E. coli* DNA Pol I, 0.5  $\mu\text{L}$  of *E. coli* RNase H) (New England Biolabs, Inc.). The reaction mixture was incubated at 16  $^{\circ}\text{C}$  for 2 h and was stopped by adding 25  $\mu\text{L}$  of 0.2 M EDTA.

DNA was purified in 35  $\mu\text{L}$  elution buffer by using a QIAquick PCR Purification kit (Qiagen, Inc.). Ten microliters of the eluate was added to 3  $\mu\text{L}$  of quick-blunting mix (1.25  $\mu\text{L}$  10 $\times$  buffer, 1.25  $\mu\text{L}$  1 mM dNTP, 0.5  $\mu\text{L}$  Blunting enzyme mix) (New England

Biolabs, Inc.). The reaction mixture was incubated at 23  $^{\circ}\text{C}$  for 30 min and at 70  $^{\circ}\text{C}$  for 10 min and then was chilled before 1  $\mu\text{L}$  of 12.5  $\mu\text{M}$  forward and reverse adaptor mix was added. Forward adaptors were engineered with three-base barcode tags to allow sample multiplexing. The sample-adaptor mix was added to 16.5  $\mu\text{L}$  of the ligation mix (15  $\mu\text{L}$  of 2 $\times$  Quick Ligase Buffer and 1.5  $\mu\text{L}$  of Quick ligase) (New England Biolabs, Inc.) and was incubated at 23  $^{\circ}\text{C}$  for 15 min. For PCR amplification, 10  $\mu\text{L}$  of the ligated sample was combined with 90  $\mu\text{L}$  of PCR mix [39  $\mu\text{L}$  of water, 10  $\mu\text{L}$  of 10 $\times$  reaction buffer (+ Mg), 10  $\mu\text{L}$  of 25 mM  $\text{MgCl}_2$ , 5  $\mu\text{L}$  of DMSO, 5  $\mu\text{L}$  of 10 mM dNTPs, 10  $\mu\text{L}$  of 10  $\mu\text{M}$  forward primer, 10  $\mu\text{L}$  of 10  $\mu\text{M}$  reverse primer, 1  $\mu\text{L}$  of Taq DNA Polymerase] (New England Biolabs, Inc.). The nick resulting from the previous adaptor ligation step was repaired by incubating the samples at 72  $^{\circ}\text{C}$  for 2 min and at 95  $^{\circ}\text{C}$  for 2 min followed by 20 cycles of 95  $^{\circ}\text{C}$  for 30 s, 60  $^{\circ}\text{C}$  for 30 s, 72  $^{\circ}\text{C}$  for 1 min and then at 72  $^{\circ}\text{C}$  for 5 min to polish ends before cooling to 4  $^{\circ}\text{C}$ . Double-stranded DNA was purified using AMPure XP magnetic beads (Agencourt).

## Other Supporting Information Files

[Table S1 \(DOC\)](#)

[Table S2 \(DOCX\)](#)

[Dataset S1 \(XLSX\)](#)
